# Supplementary material
Source: publisher figshare collection journal article supplement (https://gsapubs.figshare.com/ndownloader/files/23317166)
Supplement: Supplementary file 1 [file 23317166]

## Sheet: Fig1_LHS_blue
	Oxide
DataSet/Point	Al2O3	CaO	SiO2	MgO	FeO	Total	Distance (µm)	Forsterite content
1 / 1 .	0.0486	0.2923	39.8623	45.5293	13.9699	99.7024	0	85.3145
1 / 2 .	0.0469	0.2724	39.9264	45.5259	13.6104	99.382	12.93	85.6373
1 / 3 .	0.0368	0.262	39.9174	45.7134	13.8022	99.7319	25.86	85.5153
1 / 4 .	0.043	0.2593	40.1975	45.2379	13.6482	99.386	38.79	85.5247
1 / 5 .	0.0415	0.2555	40.1141	45.4715	13.6729	99.5556	51.72	85.5661
1 / 6 .	0.0371	0.2467	40.1496	45.4381	14.0584	99.93	64.66	85.21
1 / 7 .	0.0458	0.2498	40.3643	45.5463	13.5067	99.7129	77.59	85.7366
1 / 8 .	0.044	0.2491	40.0873	45.442	13.86	99.6823	90.52	85.3893
1 / 9 .	0.0451	0.2441	40.0869	45.6541	13.7767	99.807	103.45	85.5221
1 / 10 .	0.035	0.233	40.3635	45.3011	13.7756	99.7082	116.38	85.4267
1 / 11 .	0.0318	0.2404	39.8945	45.6297	13.6042	99.4006	129.31	85.6709
1 / 12 .	0.041	0.2418	40.261	45.6065	13.6385	99.7887	142.24	85.6337
1 / 13 .	0.0398	0.2371	40.079	45.7715	13.6704	99.7978	155.17	85.6493
1 / 14 .	0.0335	0.2512	40.3406	45.8687	13.9626	100.457	168.11	85.4139
1 / 15 .	0.0447	0.2396	40.2194	45.9072	13.4383	99.8491	181.04	85.8944
1 / 16 .	0.0396	0.2366	40.0876	45.4413	13.6629	99.468	193.97	85.5669
1 / 17 .	0.0465	0.2427	40.1308	45.327	13.7603	99.5072	206.9	85.4477
1 / 18 .	0.0469	0.2523	40.0351	45.8069	13.5909	99.7321	219.83	85.7303
1 / 19 .	0.0389	0.2476	40.3045	45.5596	13.8365	99.987	232.76	85.4426
1 / 20 .	0.0489	0.2396	40.1177	45.3718	13.6113	99.3893	245.69	85.5947
1 / 21 .	0.0388	0.2437	40.1339	45.2972	13.791	99.5045	258.62	85.4117
1 / 22 .	0.0422	0.2464	40.0597	45.5511	13.8126	99.7119	271.55	85.4618
1 / 23 .	0.0344	0.2452	40.2687	45.649	13.845	100.042	284.48	85.4594
1 / 24 .	0.0309	0.2439	40.3224	45.4383	13.2968	99.3322	297.42	85.8983
1 / 25 .	0.0412	0.2386	40.1182	45.6419	13.6183	99.6582	310.35	85.6614
1 / 26 .	0.0351	0.2447	40.0827	45.5368	13.8025	99.7018	323.28	85.467
1 / 27 .	0.037	0.2371	40.096	45.6249	13.5612	99.5562	336.21	85.7084
1 / 28 .	0.0295	0.4685	57.2204	9.6233	5.5451	72.8868	349.14	75.5711
1 / 29 .	0.0129	0.3335	35.6104	37.1662	11.1523	84.2754	362.07	85.5918
1 / 30 .	0.0743	0.2512	34.9116	42.565	11.8396	89.6418	375	86.5019
1 / 31 .	0.0458	0.2437	40.4213	46.4053	13.2396	100.356	387.93	86.2028
1 / 32 .	0.0406	0.2415	40.0907	45.7712	13.0204	99.1644	400.86	86.2377
1 / 33 .	0.0431	0.2412	40.7645	46.0054	12.7332	99.7874	413.8	86.5598
1 / 34 .	0.0316	0.2324	40.345	46.2752	13.2874	100.172	426.73	86.1264
1 / 35 .	0.0414	0.2371	40.8234	46.1834	12.3006	99.5859	439.66	87.0006
1 / 36 .	0.0377	0.2367	40.0768	46.2199	12.5956	99.1667	452.59	86.7393
1 / 37 .	0.0429	0.2339	40.7491	46.6017	12.343	99.9706	465.52	87.0635
1 / 38 .	0.0478	0.234	40.1186	46.4659	11.9466	98.8129	478.45	87.3946
1 / 39 .	0.0375	0.229	40.4491	46.487	11.8404	99.043	491.38	87.4976
1 / 40 .	0.0153	0.2443	2.151	2.0477	5.0216	9.48	504.31	42.0921
1 / 41 .	0.0374	0.2424	40.5433	46.7362	12.0174	99.5766	517.24	87.3934
1 / 42 .	0.0449	0.2296	40.659	46.5613	11.7688	99.2636	530.18	87.5812
1 / 43 .	0.0434	0.2436	40.4431	47.0204	11.8918	99.6422	543.11	87.5748
1 / 44 .	0.04	0.245	40.5371	47.0149	12.1594	99.9962	556.04	87.3294
1 / 45 .	0.0549	0.2386	40.4061	47.0167	12.0663	99.7826	568.97	87.4146
1 / 46 .	0.0527	0.2427	40.7055	46.8777	11.9844	99.863	581.9	87.4569
1 / 47 .	0.0397	0.2367	40.1322	47.1798	11.6857	99.2741	594.83	87.8001
1 / 48 .	0.0491	0.2354	40.6609	47.0495	11.532	99.527	607.76	87.9119
1 / 49 .	0.0414	0.2507	40.9504	46.9358	11.5965	99.7747	620.69	87.8266
1 / 50 .	0.0509	0.2473	40.4078	46.9994	11.6555	99.3609	633.62	87.7868
1 / 51 .	0.0491	0.2425	40.7379	46.8641	11.6106	99.5041	646.55	87.7973
1 / 52 .	0.0546	0.2475	40.8439	46.9904	12.2032	100.34	659.49	87.2837
1 / 53 .	0.0438	0.2392	40.7901	46.7104	11.6799	99.4633	672.42	87.698
1 / 54 .	0.0443	0.2486	40.599	46.8756	11.5654	99.333	685.35	87.8416
1 / 55 .	0.0533	0.2461	40.6349	46.8289	11.7402	99.5034	698.28	87.6697
1 / 56 .	0.0568	0.2441	40.2653	47.3082	11.4213	99.2957	711.21	88.0717
1 / 57 .	0.0516	0.2536	40.8474	46.9961	11.5774	99.726	724.14	87.8579
1 / 58 .	0.0433	0.249	40.6693	47.0245	11.5134	99.4996	737.07	87.9234
1 / 59 .	0.0466	0.2514	40.8793	47.1452	11.5207	99.8431	750	87.9438
1 / 60 .	0.0521	0.249	40.9152	47.3291	11.7659	100.311	762.93	87.7606
1 / 61 .	0.0493	0.2533	40.5864	47.2721	11.5549	99.716	775.87	87.9409
1 / 62 .	0.0512	0.2466	40.4283	47.4313	12.0614	100.219	788.8	87.5153
1 / 63 .	0.0448	0.2541	40.3308	47.3842	11.477	99.4908	801.73	88.0374
1 / 64 .	0.0466	0.2708	40.5702	47.0748	11.2298	99.1922	814.66	88.1968
1 / 65 .	0.0509	0.2828	40.5891	47.2436	11.6344	99.8007	827.59	87.8616
1 / 66 .	0.0433	0.2539	40.5241	47.2959	11.5963	99.7135	840.52	87.9083
1 / 67 .	0.0464	0.2781	40.8012	47.252	11.7607	100.138	853.45	87.7479
1 / 68 .	0.055	0.2726	40.3979	46.8949	11.6977	99.318	866.39	87.724
1 / 69 .	0.0471	0.3989	40.3946	47.2166	11.6081	99.6653	879.32	87.8796
1 / 70 .	0.0517	0.2585	40.4981	47.4843	11.5984	99.8911	892.25	87.9486
1 / 71 .	0.0468	0.2544	40.4118	47.3212	11.5835	99.6178	905.18	87.9257
1 / 72 .	0.0568	0.2563	40.1143	47.0198	11.4995	98.9468	918.11	87.9351
1 / 73 .	0.0418	0.2622	40.6944	47.0716	11.3933	99.4633	931.04	88.0448
1 / 74 .	0.0508	0.2677	40.6296	47.2981	11.4213	99.6675	943.97	88.0695
1 / 75 .	0.0522	0.2613	40.3824	47.0866	11.0844	98.8668	956.91	88.3344
1 / 76 .	0.0426	0.2535	40.4788	47.0102	11.5435	99.3286	969.84	87.8924
1 / 77 .	0.0487	0.2791	40.607	47.3509	11.6904	99.976	982.77	87.8345
1 / 78 .	0.0456	0.3369	40.3246	47.1378	11.2731	99.118	995.7	88.1707
1 / 79 .	0.053	0.2657	40.5794	47.318	11.3261	99.5422	1008.63	88.1615
1 / 80 .	0.0489	0.2549	40.5239	47.2591	11.4962	99.5829	1021.56	87.9919
1 / 81 .	0.0539	0.2563	40.7112	47.0787	11.5753	99.6754	1034.49	87.8786
1 / 82 .	0.0512	0.2497	40.2734	47.3441	11.2532	99.1716	1047.43	88.2345
1 / 83 .	0.0468	0.2527	40.7357	47.3167	11.6134	99.9652	1060.36	87.8973
1 / 84 .	0.0499	0.2566	40.2664	47.2851	11.5302	99.388	1073.29	87.9665
1 / 85 .	0.0512	0.2498	40.157	47.1311	11.3367	98.9258	1086.22	88.1104
1 / 86 .	0.0464	0.2606	40.282	47.3908	11.1022	99.082	1099.15	88.3841
1 / 87 .	0.0479	0.2597	40.2926	47.2457	11.0889	98.9348	1112.08	88.365
1 / 88 .	0.0403	0.2538	40.4643	47.1204	11.121	98.9997	1125.01	88.3078
1 / 89 .	0.0464	0.2723	40.25	47.3173	11.3536	99.2395	1137.94	88.1361
1 / 90 .	0.0443	0.2492	40.4011	47.1226	10.9546	98.7718	1150.87	88.463
1 / 91 .	0.0534	0.2531	40.084	47.3311	11.2988	99.0205	1163.81	88.1896
1 / 92 .	0.0518	0.2588	40.3464	46.919	11.2437	98.8196	1176.74	88.1494
1 / 93 .	0.0543	0.246	40.5605	47.1714	11.5238	99.5561	1189.67	87.9469
1 / 94 .	0.047	0.2533	40.429	46.8259	11.0833	98.6385	1202.6	88.2781
1 / 95 .	0.0497	0.2536	40.2414	47.2667	11.4546	99.266	1215.53	88.0319
1 / 96 .	0.0449	0.2527	40.3027	47.3069	11.3765	99.2836	1228.46	88.1127
1 / 97 .	0.0434	0.2541	40.1667	47.2402	11.2587	98.9631	1241.39	88.2066
1 / 98 .	0.0479	0.2649	40.1229	46.932	11.2067	98.5745	1254.33	88.1866
1 / 99 .	0.049	0.2522	39.9882	47.4244	11.3444	99.0582	1267.26	88.1681
1 / 100 .	0.0458	0.2582	39.7915	47.0972	11.6603	98.8531	1280.19	87.8047
1 / 101 .	0.0611	0.2623	40.134	46.936	11.141	98.5344	1293.12	88.2486
1 / 102 .	0.0535	0.2571	39.946	47.0032	11.4785	98.7382	1306.05	87.9508
1 / 103 .	0.0451	0.276	40.1277	47.0934	11.2977	98.84	1318.98	88.1381
1 / 104 .	0.0463	0.2617	40.0206	46.9483	11.1526	98.4295	1331.91	88.2406
1 / 105 .	0.0543	0.2551	40.2471	47.3024	11.0362	98.8951	1344.85	88.4261
1 / 106 .	0.0477	0.2619	40.0728	47.1569	11.54	99.0792	1357.78	87.9287
1 / 107 .	0.0535	0.2497	40.2991	47.0247	11.4509	99.0779	1370.71	87.9811
1 / 108 .	0.0432	0.2507	40.1457	46.9169	11.1885	98.5449	1383.64	88.2002
1 / 109 .	0.0572	0.2545	39.9977	47.0197	11.3115	98.6405	1396.57	88.1089
1 / 110 .	0.049	0.2774	39.7691	47.1107	11.4339	98.6401	1409.5	88.0161
1 / 111 .	0.0553	0.2498	39.9292	47.4053	11.2761	98.9157	1422.43	88.2268
1 / 112 .	0.0541	0.257	40.3408	47.1127	11.2704	99.035	1435.37	88.1676
1 / 113 .	0.052	0.2466	40.1194	47.0389	11.2946	98.7515	1448.3	88.1288
1 / 114 .	0.0542	0.2427	40.3587	47.3389	11.0754	99.0699	1461.23	88.3977
1 / 115 .	0.0522	0.2922	39.9697	47.0465	11.2842	98.6449	1474.16	88.1401
1 / 116 .	0.0493	0.2577	39.7261	46.9238	11.2632	98.2201	1487.09	88.1323
1 / 117 .	0.0452	0.2957	39.9699	46.9622	10.8225	98.0955	1500.02	88.5518
1 / 118 .	0.0457	0.2536	39.9403	46.9525	11.175	98.367	1512.95	88.2207
1 / 119 .	0.0512	0.2681	40.0179	47.3953	11.6454	99.3779	1525.88	87.8857
1 / 120 .	0.0534	0.2482	39.9494	46.8366	11.4874	98.575	1538.81	87.9049

## Sheet: Fig1_LHS_red
	Oxide
DataSet/Point	Al2O3	CaO	SiO2	MgO	FeO	Total	Distance (µm)	Forsterite content
1 / 1 .	0.0493	0.2607	40.2147	45.2867	13.4764	99.2878	0	85.6941
1 / 2 .	0.0484	0.2529	40.3651	45.2558	13.6877	99.61	15.34	85.4938
1 / 3 .	0.0475	0.2435	40.1787	45.5352	13.7311	99.736	30.67	85.5309
1 / 4 .	0.0481	0.2444	40.2589	45.6816	13.6673	99.9003	46.01	85.6279
1 / 5 .	0.0508	0.2379	40.3145	45.5736	13.4082	99.5849	61.34	85.8331
1 / 6 .	0.0458	0.2435	40.5959	45.6158	13.403	99.9039	76.68	85.8491
1 / 7 .	0.0492	0.2463	40.2903	45.7384	13.4972	99.8214	92.02	85.7965
1 / 8 .	0.0453	0.2309	40.4079	45.7319	13.3226	99.7386	107.35	85.9527
1 / 9 .	0.0492	0.2379	40.0098	45.8523	13.0314	99.1805	122.69	86.2487
1 / 10 .	0.0535	0.2334	40.2719	45.93	13.2957	99.7845	138.03	86.0292
1 / 11 .	0.049	0.2395	40.1346	45.6919	13.1001	99.2153	153.36	86.1444
1 / 12 .	0.0495	0.2476	40.8669	45.6028	12.9428	99.7096	168.7	86.2649
1 / 13 .	0.0486	0.2339	40.3423	45.9281	13.4862	100.039	184.04	85.8568
1 / 14 .	0.0538	0.2397	40.3258	46.1564	12.8758	99.6515	199.37	86.4681
1 / 15 .	0.0488	0.2399	40.8398	45.8662	12.837	99.8316	214.71	86.4295
1 / 16 .	0.045	0.2314	40.8396	45.9478	13.1184	100.182	230.04	86.1943
1 / 17 .	0.0523	0.2256	40.2303	45.9105	13.2725	99.6911	245.38	86.045
1 / 18 .	0.0536	0.2306	40.6611	45.9246	13.1266	99.9966	260.72	86.1809
1 / 19 .	0.0525	0.2328	40.5826	45.4611	13.2132	99.5422	276.05	85.9806
1 / 20 .	0.0434	0.2298	40.6644	45.7278	13.0628	99.7282	291.39	86.1878
1 / 21 .	0.0506	0.2399	40.2186	45.8045	12.873	99.1866	306.72	86.3808
1 / 22 .	0.0502	0.2269	40.3817	45.5573	13.7558	99.9719	322.06	85.5146
1 / 23 .	0.0421	0.2405	40.5178	45.4023	13.2159	99.4187	337.4	85.9625
1 / 24 .	0.0498	0.2362	40.3829	45.7124	13.228	99.6092	352.73	86.0334
1 / 25 .	0.0518	0.2293	39.8836	45.4648	13.1327	98.7621	368.07	86.055
1 / 26 .	0.0444	0.2361	40.6713	45.7899	13.75	100.492	383.41	85.5828
1 / 27 .	0.05	0.2457	40.2113	45.4753	13.7386	99.7208	398.74	85.5078
1 / 28 .	0.0471	0.2415	40.4216	45.4084	13.5481	99.6667	414.08	85.6619
1 / 29 .	0.0539	0.2487	40.2402	45.5559	13.4205	99.5191	429.41	85.8172
1 / 30 .	0.05	0.2424	40.2072	45.718	13.5678	99.7854	444.75	85.7274
1 / 31 .	0.04	0.2428	40.6781	45.8345	13.731	100.526	460.09	85.6118
1 / 32 .	0.0453	0.2311	40.7866	45.9276	13.2805	100.271	475.42	86.0423
1 / 33 .	0.0332	0.2416	40.4377	45.8985	13.0663	99.6773	490.76	86.2289
1 / 34 .	0.0356	0.2361	40.3804	45.9414	13.093	99.6865	506.09	86.2157
1 / 35 .	0.038	0.2312	40.6082	46.3565	12.974	100.208	521.43	86.4297
1 / 36 .	0.0405	0.2333	40.3606	46.4299	12.7277	99.792	536.77	86.6713
1 / 37 .	0.0351	0.233	40.8116	46.3993	12.4395	99.9185	552.1	86.9261
1 / 38 .	0.0368	0.2382	40.6902	46.6785	12.1331	99.7768	567.44	87.2737
1 / 39 .	0.0389	0.2262	40.1811	46.4438	12.0768	98.9668	582.78	87.2694
1 / 40 .	0.0421	0.2285	40.5343	46.7131	11.8844	99.4025	598.11	87.5101
1 / 41 .	0.0492	0.2401	40.4606	46.9261	12.0987	99.7747	613.45	87.3638
1 / 42 .	0.0495	0.2399	40.6135	46.8516	11.8096	99.5641	628.78	87.6111
1 / 43 .	0.0451	0.2386	40.9368	46.7201	11.7665	99.7071	644.12	87.6203
1 / 44 .	0.051	0.24	40.5383	47.0534	11.4796	99.3624	659.46	87.9611
1 / 45 .	0.0559	0.2481	41.0329	47.0356	11.6604	100.033	674.79	87.7905
1 / 46 .	0.047	0.2412	40.6355	46.9022	11.4568	99.2826	690.13	87.948
1 / 47 .	0.0451	0.2468	40.9415	47.0092	11.2321	99.4747	705.47	88.1802
1 / 48 .	0.055	0.2351	40.5646	46.9627	11.7462	99.5636	720.8	87.695
1 / 49 .	0.044	0.2363	40.5773	47.093	11.8035	99.7541	736.14	87.6724
1 / 50 .	0.058	0.2404	40.5546	47.1534	11.6831	99.6896	751.47	87.7965
1 / 51 .	0.0501	0.2381	40.897	47.1249	11.3989	99.709	766.81	88.0516
1 / 52 .	0.0356	0.2384	40.7103	47.1433	11.7808	99.9083	782.15	87.7047
1 / 53 .	0.0444	0.236	40.717	47.0425	11.9086	99.9486	797.48	87.5646
1 / 54 .	0.0512	0.2409	40.7252	47.073	11.5465	99.6366	812.82	87.9038
1 / 55 .	0.0469	0.2291	40.3271	46.8775	11.237	98.7176	828.16	88.1463
1 / 56 .	0.0462	0.2416	40.8762	47.2524	12.0108	100.427	843.49	87.5199

## Sheet: Fig1_RHS_green
	Oxide
DataSet/Point	Al2O3	CaO	SiO2	MgO	FeO	Total	Distance (µm)	Forsterite content
1 / 1 .	0.0341	0.328	39.8943	44.4158	15.1031	99.7753	0	83.9799
1 / 2 .	0.0526	0.26	39.9843	44.5049	15.0493	99.8511	18.42	84.0547
1 / 3 .	0.0405	0.2479	39.9955	44.7896	14.7125	99.786	36.84	84.4397
1 / 4 .	0.0432	0.2388	40.0727	44.9458	14.3919	99.6924	55.25	84.772
1 / 5 .	0.0486	0.2384	39.7568	45.0251	14.2682	99.3371	73.67	84.9057
1 / 6 .	0.0554	0.2413	40.2859	45.2369	14.095	99.9145	92.09	85.1211
1 / 7 .	0.0402	0.2318	40.0132	45.2858	13.5247	99.0957	110.51	85.6499
1 / 8 .	0.0473	0.2304	39.7925	45.4275	13.3488	98.8464	128.93	85.8481
1 / 9 .	0.0434	0.2266	39.9047	45.1598	13.6286	98.9631	147.34	85.5211
1 / 10 .	0.0398	0.2277	40.1324	45.6162	13.3411	99.3572	165.76	85.9053
1 / 11 .	0.0474	0.2298	40.0477	45.3799	13.2427	98.9474	184.18	85.9321
1 / 12 .	0.0422	0.2283	40.0026	45.5308	13.5387	99.3425	202.6	85.7034
1 / 13 .	0.0401	0.2279	40.02	45.6261	13.0521	98.9664	221.01	86.171
1 / 14 .	0.0404	0.2325	40.1847	45.4292	13.1095	98.9964	239.43	86.0669
1 / 15 .	0.0427	0.2319	40.1865	45.7452	13.1564	99.3627	257.85	86.1071
1 / 16 .	0.0392	0.2293	40.084	45.5559	12.9644	98.8728	276.27	86.2329
1 / 17 .	0.0404	0.2313	40.3417	45.4821	12.9719	99.0675	294.69	86.2068
1 / 18 .	0.0426	0.2336	39.99	45.5734	13.4227	99.2622	313.1	85.8199
1 / 19 .	0.044	0.2296	40.1238	45.7429	13.0093	99.1496	331.52	86.2405
1 / 20 .	0.0551	0.2303	40.0055	45.6744	13.155	99.1203	349.94	86.0898
1 / 21 .	0.05	0.2295	40.2075	45.6858	13.0784	99.2511	368.36	86.1626
1 / 22 .	0.0572	0.232	40.4044	45.6732	13.0471	99.414	386.78	86.1879
1 / 23 .	0.0461	0.2288	40.2253	45.6883	12.8684	99.0568	405.19	86.3551
1 / 24 .	0.0474	0.2318	39.9019	45.3434	12.7929	98.3173	423.61	86.3352
1 / 25 .	0.0484	0.2243	40.1658	45.6887	13.2165	99.3437	442.03	86.0377
1 / 26 .	0.0479	0.2302	40.0979	45.4359	12.638	98.4499	460.45	86.5021
1 / 27 .	0.0453	0.2234	40.4922	45.557	12.8686	99.1866	478.87	86.321
1 / 28 .	0.0495	0.2317	40.1589	45.6667	12.642	98.7489	497.28	86.5574
1 / 29 .	0.0551	0.2299	40.0615	45.5153	13.1194	98.9811	515.7	86.0805
1 / 30 .	0.0502	0.2329	40.1934	45.8415	12.8842	99.2022	534.12	86.3801
1 / 31 .	0.0385	0.2313	40.184	45.6139	12.6786	98.7464	552.54	86.5103
1 / 32 .	0.0454	0.23	40.0646	45.5971	12.7696	98.7067	570.95	86.4223
1 / 33 .	0.0497	0.2291	40.0767	45.8883	12.7768	99.0206	589.37	86.4902
1 / 34 .	0.0402	0.2294	40.3212	45.5094	12.8885	98.9888	607.79	86.2904
1 / 35 .	0.0426	0.2281	40.1666	45.662	12.9996	99.0989	626.21	86.2283
1 / 36 .	0.0392	0.2271	39.9157	45.9225	12.9605	99.065	644.63	86.3313
1 / 37 .	0.0494	0.2457	40.0714	45.4782	13.2441	99.0888	663.04	85.9569
1 / 38 .	0.047	0.2262	40.3406	45.5417	12.7719	98.9274	681.46	86.4059
1 / 39 .	0.0492	0.2337	39.8277	45.957	12.8807	98.9483	699.88	86.4129
1 / 40 .	0.0489	0.2309	40.0877	45.9746	12.8846	99.2268	718.3	86.4138
1 / 41 .	0.0491	0.2245	40.3134	46.0162	12.3203	98.9235	736.72	86.9413
1 / 42 .	0.0528	0.2261	40.4388	46.0308	12.6045	99.3531	755.13	86.6839
1 / 43 .	0.0508	0.2314	40.1909	46.3454	12.2898	99.1083	773.55	87.05
1 / 44 .	0.0504	0.2353	40.382	46.1658	12.2792	99.1128	791.97	87.0159
1 / 45 .	0.0519	0.2213	40.338	46.0157	12.373	98.9998	810.39	86.8927
1 / 46 .	0.0542	0.2302	40.3456	46.1799	12.0427	98.8526	828.81	87.2375
1 / 47 .	1.542	1.1938	14.6666	18.6553	2.3002	38.3579	847.22	93.5304
1 / 48 .	0.0511	0.2328	40.4458	46.2626	11.8819	98.8742	865.64	87.4061
1 / 49 .	0.0587	0.2302	40.3737	45.9459	11.9359	98.5444	884.06	87.2801
1 / 50 .	0.0456	0.2187	40.3572	46.4556	11.8142	98.8913	902.48	87.5144
1 / 51 .	0.0568	0.2292	40.274	46.5941	11.9675	99.1215	920.89	87.4057
1 / 52 .	0.0514	0.2426	40.3319	46.5583	11.8702	99.0544	939.31	87.4869
1 / 53 .	0.0517	0.2404	40.5325	46.5696	12.0233	99.4175	957.73	87.3486
1 / 54 .	0.0479	0.2337	40.6957	46.6708	12.2199	99.8679	976.15	87.1925
1 / 55 .	0.0448	0.2257	40.1867	46.8636	11.8977	99.2185	994.57	87.533
1 / 56 .	0.0477	0.2265	40.5087	46.4289	11.7088	98.9205	1012.98	87.6058
1 / 57 .	0.0572	0.2269	40.5207	46.382	11.7686	98.9553	1031.4	87.5394
1 / 58 .	0.0511	0.2234	40.4315	46.5445	11.3001	98.5505	1049.82	88.0127
1 / 59 .	0.0416	0.2307	40.2101	46.486	11.5461	98.5145	1068.24	87.7701
1 / 60 .	0.0462	0.2306	40.5142	46.5921	11.3669	98.75	1086.66	87.9612
1 / 61 .	0.0515	0.2289	40.3489	46.7216	11.4693	98.8202	1105.07	87.8955
1 / 62 .	0.0476	0.2277	40.5699	46.6151	11.1828	98.643	1123.49	88.1382
1 / 63 .	0.0477	0.2347	40.5098	47.0761	11.604	99.4723	1141.91	87.8516
1 / 64 .	0.0434	0.2304	40.892	46.5736	11.5766	99.3161	1160.33	87.762
1 / 65 .	0.0418	0.2297	40.4249	46.7559	11.3323	98.7846	1178.75	88.0305
1 / 66 .	0.0468	0.2275	40.449	46.6843	11.2974	98.705	1197.16	88.0468
1 / 67 .	0.0521	0.2319	40.4859	46.7107	11.5596	99.0402	1215.58	87.8093
1 / 68 .	0.0461	0.2349	40.4074	46.8001	11.501	98.9895	1234	87.884
1 / 69 .	0.0418	0.2408	40.4118	46.856	11.4066	98.957	1252.42	87.9841
1 / 70 .	0.0438	0.2298	40.9251	46.8719	11.3705	99.4411	1270.84	88.0211
1 / 71 .	0.0473	0.2326	40.5815	46.5301	11.1263	98.5178	1289.25	88.172
1 / 72 .	0.0813	0.2544	42.0627	48.6555	11.1966	102.25	1307.67	88.5663
1 / 73 .	0.0436	0.2271	40.9988	46.8218	11.2171	99.3084	1326.09	88.1524
1 / 74 .	0.0489	0.2341	40.3911	46.6516	11.3328	98.6584	1344.51	88.0065
1 / 75 .	0.0514	0.2307	40.4629	46.6428	11.4663	98.8541	1362.92	87.8803
1 / 76 .	0.0403	0.2363	40.3146	46.7354	11.3575	98.6841	1381.34	88.0024
1 / 77 .	0.0499	0.2273	40.3372	46.8002	11.217	98.6316	1399.76	88.1477
1 / 78 .	0.0446	0.2326	40.6688	46.6685	11.3544	98.9689	1418.18	87.9902
1 / 79 .	0.0489	0.2332	40.723	46.7471	11.0899	98.8421	1436.6	88.2545
1 / 80 .	0.0493	0.2303	40.6239	46.8325	11.5459	99.2819	1455.01	87.8498
1 / 81 .	0.0552	0.2242	40.4375	47.0228	11.4722	99.2119	1473.43	87.961
1 / 82 .	0.05	0.233	40.4456	46.5058	11.4136	98.648	1491.85	87.898
1 / 83 .	0.0478	0.2279	40.2962	47.0017	11.5636	99.1372	1510.27	87.8719
1 / 84 .	0.0594	0.237	40.3411	46.9558	11.644	99.2374	1528.68	87.7874
1 / 85 .	0.0582	0.2334	40.2706	46.6355	11.6507	98.8484	1547.1	87.7077
1 / 86 .	0.0457	0.2316	40.1966	46.6676	11.6886	98.8301	1565.52	87.68
1 / 87 .	0.0503	0.228	40.2324	46.5691	11.9106	98.9904	1583.94	87.4522
1 / 88 .	0.046	0.2274	39.9293	46.5922	11.853	98.6479	1602.36	87.5107
1 / 89 .	0.052	0.2362	40.1787	46.3049	11.9771	98.749	1620.77	87.3281
1 / 90 .	0.0534	0.239	40.4019	46.0726	11.819	98.5859	1639.19	87.4192
1 / 91 .	0.0458	0.2305	40.6517	46.405	11.8625	99.1956	1657.61	87.4578
1 / 92 .	0.0443	0.2256	40.1731	46.1198	12.514	99.0767	1676.03	86.789
1 / 93 .	0.0432	0.229	40.1281	45.8354	12.3309	98.5666	1694.45	86.8868
1 / 94 .	0.0462	0.2357	40.1694	45.7553	12.8476	99.0542	1712.86	86.3914
1 / 95 .	0.0451	0.2356	39.7003	45.5939	13.3314	98.9062	1731.28	85.9082
1 / 96 .	0.0467	0.2353	39.9428	45.1341	13.3262	98.685	1749.7	85.7898
1 / 97 .	0.0471	0.2346	39.4139	44.687	13.9442	98.3269	1768.12	85.1024
1 / 98 .	0.052	0.2463	39.537	44.3347	15.0696	99.2396	1786.54	83.9852
1 / 99 .	0.0385	0.2553	39.5091	43.7009	14.9884	98.4922	1804.95	83.8638
1 / 100 .	0.0486	0.2837	39.1296	42.8208	15.9996	98.2822	1823.37	82.6711
